1 **Idiosyncratic, retinotopic bias in face identification**  
2 **modulated by familiarity**

3 Abbreviated title: Retinotopic bias in face identification

4 Matteo Visconti di Oleggio Castello<sup>1,\*</sup>, Morgan Taylor<sup>1</sup>, Patrick Cavanagh<sup>1,2</sup>,  
5 M. Ida Gobbin<sup>1,3,\*</sup>

6 <sup>1</sup>Department of Psychological & Brain Sciences,  
7 Dartmouth College,  
8 Hanover NH, 03755, USA

9 <sup>2</sup>Department of Psychology  
10 Glendon College

11 Toronto ON, M4N 3M6 Canada

12 <sup>3</sup>Dipartimento di Medicina Specialistica, Diagnostica, e Sperimentale,  
13 University of Bologna,  
14 40100 Bologna, Italy

15 \*corresponding authors:

16 M. Ida Gobbin, [maria.i.gobbin@dartmouth.edu](mailto:maria.i.gobbin@dartmouth.edu), [mariaida.gobbin@unibo.it](mailto:mariaida.gobbin@unibo.it)

17 Matteo Visconti di Oleggio Castello, [mvdoc.gr@dartmouth.edu](mailto:mvdoc.gr@dartmouth.edu)

18 6207 Moore Hall

19 Dartmouth College

20 Hanover, NH 03755, USA

21

22 Number of pages: 29

23 Number of figures: 4

24 Number of tables: 3

25 Words (Abstract): 165

26 Words (Introduction): 632

27 Words (Discussion): 597

28

29 **Conflict of Interest**

30 The authors declare no competing financial interests.

31

32 **Acknowledgments**

33 We would like to thank the Martens Family Fund for its support.

## 34 **Abstract**

35 The perception of gender and age of unfamiliar faces is reported to vary  
36 idiosyncratically across retinal locations such that, for example, the same  
37 androgynous face may appear to be male at one location but female at another.  
38 Here we test spatial heterogeneity for the recognition of the *identity* of personally  
39 familiar faces. We found idiosyncratic biases that were stable within subjects  
40 and that varied more across locations for low as compared to high familiar faces.  
41 These data suggest that like face gender and age, face identity is processed, in  
42 part, by independent populations of neurons monitoring restricted spatial  
43 regions and that the recognition responses vary for the same face across these  
44 different locations. Moreover, repeated exposure to the same face in different  
45 portions of the visual field due to repeated and varied social interactions appears  
46 to lead to adjustment of these independent face recognition neurons so that the  
47 same familiar face is eventually more likely to elicit the same recognition  
48 response across widely separated regions.

## 49 **Significance statement**

50 In this work we tested spatial heterogeneity for the recognition of personally  
51 familiar faces. We found retinotopic biases that varied more across locations for  
52 low as compared to highly familiar faces. The retinotopic biases were  
53 idiosyncratic and stable within subjects. Our data suggest that, like face gender  
54 and age, face identity is processed by independent populations of neurons

55 monitoring restricted spatial regions and that recognition may vary for the same  
56 face at these different locations. Unlike previous findings, our data show how  
57 the effect of learning modifies the representation of face identity in  
58 retinotopically-organized visual cortex. This new perspective has broader  
59 implications for understanding how learning optimizes visual processes for  
60 socially salient stimuli.

## 61 **Introduction**

62 We spend most of our days interacting with acquaintances, family and close  
63 friends. Because of these repeated and protracted interactions, the  
64 representation of personally familiar faces is rich and complex, as reflected by  
65 stronger and more widespread neural activation in the distributed face  
66 processing network, as compared to responses to unfamiliar faces (Gobbini and  
67 Haxby, 2007; Taylor et al., 2009; Gobbini, 2010; Natu and O’Toole, 2011; Bobes  
68 et al., 2013; Sugiura, 2014; Ramon and Gobbini, 2017; Visconti di Oleggio  
69 Castello et al., 2017a). Differences in representations of familiar as compared to  
70 unfamiliar faces is also reflected in faster detection of familiar faces and more  
71 robust recognition (Burton et al., 1999; Gobbini et al., 2013; Ramon et al., 2015;  
72 Visconti di Oleggio Castello and Gobbini, 2015; Visconti di Oleggio Castello et  
73 al., 2017b). Thus, despite the subjective feeling of expertise with faces in general  
74 (Diamond and Carey, 1986), our visual system seems to be optimized for the  
75 processing of familiar faces. The mechanisms underlying the prioritized

76 processing of familiar faces are still a matter of investigation (Guntupalli and  
77 Gobbini, 2017; Ramon and Gobbini, 2017; Young and Burton, 2017).

78 The advantage for familiar faces could originate at different stages of the visual  
79 processing stream. In a study measuring saccadic reaction time, correct and  
80 reliable saccades to familiar faces were recorded as fast as 180 ms when  
81 unfamiliar faces were distractors (Visconti di Oleggio Castello and Gobbini,  
82 2015). At such short latencies it is unlikely that a viewpoint-invariant  
83 representation of an individual face's identity drives the saccadic response. To  
84 account for facilitated, rapid detection of familiarity, we have previously  
85 hypothesized that personally familiar faces may be recognized quickly based on  
86 diagnostic, idiosyncratic features, which become highly learned through  
87 extensive personal interactions (Visconti di Oleggio Castello and Gobbini, 2015;  
88 Visconti di Oleggio Castello et al., 2017b). In a study of perception of gaze  
89 direction and head angle, changes in eye gaze were detected around 100ms  
90 faster in familiar than in unfamiliar faces (Visconti di Oleggio Castello and  
91 Gobbini, 2015). These data provide support for the hypothesis that facial  
92 features that are diagnostic for identity are processed more efficiently for familiar  
93 as compared to unfamiliar faces. Detection of these features may occur early in  
94 the visual hierarchy, allowing an initial, fast differential processing for personally  
95 familiar faces.

96 Processes occurring at early stages of the visual system can show idiosyncratic  
97 retinotopic biases (Greenwood et al., 2017). Afraz et al. (2010) reported

98 retinotopic biases for perceiving face gender and age that vary depending on  
99 stimulus location in the visual field and were specific to each subject. These  
100 results suggest that neurons in higher-order face areas have restricted receptive  
101 fields or, equivalently, that diagnostic facial features for gender and age are  
102 encoded in retinotopic visual cortices. Here we reasoned that diagnostic visual  
103 features that play a role in visual processes for individuating faces may show  
104 idiosyncratic retinotopic biases and that these biases may be tuned by repeated  
105 interactions with personally familiar faces. Such biases may affect recognition of  
106 the identities presented in different parts of the visual field and may be  
107 modulated by the familiarity of those identities.

108 We tested this hypothesis by presenting participants with morphed stimuli of  
109 personally familiar individuals that were briefly shown at different retinal  
110 locations. In two separate experiments we found that participants showed  
111 idiosyncratic biases for specific identities in different visual field locations, and  
112 these biases were stable on retesting after weeks. Importantly, the range of the  
113 retinal biases was inversely correlated with the reported familiarity of each target  
114 identity, suggesting that prolonged personal interactions with the target  
115 individuals reduced retinal biases. These findings provide additional support for  
116 the hypothesis that asymmetries in the processing of personally familiar faces  
117 can arise at stages of the visual processing hierarchy where there is still  
118 retinotopic coding.

## 119 **Materials and Methods**

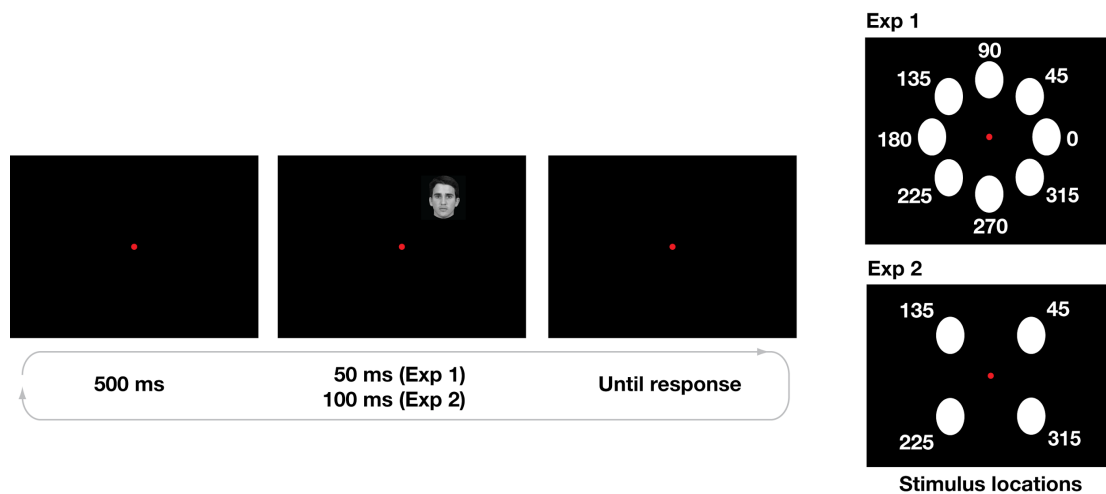

**Figure 1. Experimental paradigm.** The left panel shows an example of the experimental paradigm, while the right panel shows the angular locations used in Experiment 1 (eight locations, top panel) and in Experiment 2 (four locations, bottom panel).

### 120 **Stimuli**

121 Pictures of the faces of individuals who were personally familiar to the  
122 participants (graduate students in the same department) were taken in a photo  
123 studio room with the same lighting condition and the same camera. Images of  
124 two individuals were used for Experiment 1, and images of three individuals were  
125 used for Experiment 2. All individuals portrayed in the stimuli signed written  
126 informed consent to use their pictures for research and in publications.

127 The images were converted to grayscale, resized and centered so that the eyes  
128 were aligned in the same position for the three identities, and the background  
129 was manually removed. These operations were performed using ImageMagick  
130 and Adobe Photoshop CS4. The resulting images were matched in luminance

131 (average pixel intensity) using the SHINE toolbox (function *lumMatch*)  
132 (Willenbockel et al., 2010) after applying an oval mask, so that only pixels  
133 belonging to the face were modified. The luminance-matched images were then  
134 used to create morph continua (between two identities in Experiment 1, see  
135 Figure 2; and among three identities in Experiment 2, see Figure 3) using  
136 Abrosoft Fantamorph (v. 5.4.7) with seven percentages of morphing: 0, 17, 33,  
137 50, 67, 83, 100 (see Figures 2, 3).

## 138 ***Experiment 1***

### 139 *Paradigm*

140 The experimental paradigm was similar to that by (Afraz et al., 2010). In every  
141 trial participants would see a briefly flashed image in one of eight locations at  
142 the periphery of their visual field (see Figure 1). Each image was shown for 50  
143 ms at a distance of 7° of visual angle from the fixation point, and subtended  
144 approximately 4° x 4° of visual angle. The images could appear in one of eight  
145 locations evenly spaced by 45 angular degrees. For Experiment 1, only the  
146 morph *ab* was used (see Figure 1). Participants were required to maintain fixation  
147 on a central red dot subtending approximately 1° of visual angle.

148 After the image disappeared, participants reported which identity they saw using  
149 the left (identity *a*) and right (identity *b*) arrow keys. There was no time limit for  
150 responding, and participants were asked to be as accurate as possible. After

151 responding, participants had to press the spacebar key to continue to the next  
152 trial.

153 Participants performed five blocks containing 112 trials each, for a total of 560  
154 trials. In each block all the images appeared twice for every angular location (8  
155 angular locations x 7 morph percentages x 2 = 112). This provided ten data  
156 points for each percentage morphing at each location, for a total of 70 trials at  
157 each angular location.

158 Before the experimental session participants were shown the identities used in  
159 the experiment (corresponding to 0% and 100% morphing, see Figure 2), and  
160 practiced the task with 20 trials. These data were discarded from the analyses.  
161 Participants performed two identical experimental sessions at least four weeks  
162 apart.

163 Participants sat at a distance of approximately 50 cm from the screen, with their  
164 chin positioned on a chin-rest. The experiment was run using Psychtoolbox  
165 (Kleiner et al., 2007) (version 3.0.12) in MATLAB (R2014b). The screen operated  
166 at a resolution of 1920x1200 and a 60Hz refresh rate.

### 167 *Subjects*

168 We recruited six subjects for this experiment (three males, including one of the  
169 authors, MVdOC). The sample size for Experiment 1 was not determined by  
170 formal estimates of power, and was limited by the availability of participants  
171 familiar with the stimulus identities. After the first experimental session, two



172 participants (one male, one female) were at chance level in the task, thus only  
173 data from four subjects (two males, mean age  $27.50 \pm 2.08$  SD) were used for  
174 the final analyses.

175 All subjects had normal or corrected-to-normal vision, and provided written  
176 informed consent to participate in the experiment. The study was approved by  
177 the Dartmouth College Committee for the Protection of Human Subjects.

## 178 ***Experiment 2***

### 179 *Paradigm*

180 Experiment 2 differed from Experiment 1 in the following parameters (see  
181 Figures 1, 3): 1. three morph continua (*ab*, *ac*, *bc*) instead of one; 2. images  
182 appeared in four angular locations ( $45^\circ$ ,  $135^\circ$ ,  $225^\circ$ ,  $315^\circ$ ) instead of eight; 3.  
183 images were shown for 100 ms instead of 50 ms to make the task easier.

184 All other parameters were the same as in Experiment 1. Participants had to  
185 indicate which of the three identities they saw by pressing the left (identity *a*),  
186 right (identity *b*), or down (identity *c*) arrow keys.

187 Participants performed ten blocks containing 84 trials each, for a total of 840  
188 trials. In each block all the images appeared once for every angular location (4  
189 angular locations x 7 morph percentages x 3 morphs = 84). We used 70 data  
190 points at every angular location to fit the model for each pair of identities. Thus,

191 we used the responses to different unmorphed images for each pair of identities,  
192 ensuring independence of the models.

193 Before the experimental session participants were shown the identities used in  
194 the experiment (corresponding to 0% and 100% morphing, see Figure 3), and  
195 practiced the task with 20 trials. These data were discarded from the analyses.  
196 Participants performed two experimental sessions at least four weeks apart.

### 197 *Subjects*

198 Ten participants (five males, mean age  $27.30 \pm 1.34$  SD) participated in  
199 Experiment 2, five of which were recruited for Experiment 1 as well. No authors  
200 participated in Experiment 2. The sample size ( $n = 10$ ) was determined using  
201 G\*Power3 (Faul et al., 2007, 2009) to obtain 80% power at  $\alpha = 0.05$  based on  
202 the correlation of the PSE estimates across sessions in Experiment 1, using a  
203 bivariate normal model (one-tailed).

204 All subjects had normal or corrected-to-normal vision, and provided written  
205 informed consent to participate in the experiment. The study was approved by  
206 the Dartmouth College Committee for the Protection of Human Subjects.

### 207 ***Familiarity and contact scales***

208 After the two experimental sessions, participants completed a questionnaire  
209 designed to assess how familiar each participant was with the identities shown  
210 in the experiment. Participants saw each target identity, and were asked to

211 complete various scales for that identity. The questionnaire comprised the  
212 “Inclusion of the Other in the Self” scale (IOS) (Aron et al., 1992; Gächter et al.,  
213 2015), the “Subjective Closeness Inventory” (SCI) (Berscheid et al., 1989), and  
214 the “We-scale” (Cialdini et al., 1997). The IOS scale showed two circles  
215 increasingly overlapping labeled “You” and “X”, and participants were given the  
216 following instructions: *Using the figure below select which pair of circles best*  
217 *describes your relationship with this person. In the figure “X” serves as a*  
218 *placeholder for the person shown in the image at the beginning of this section,*  
219 *and you should think of “X” being that person. By selecting the appropriate*  
220 *number please indicate to what extent you and this person are connected (Aron*  
221 *et al., 1992; Gächter et al., 2015). The SCI scale comprised the two following*  
222 *questions: Relative to all your other relationships (both same and opposite sex)*  
223 *how would you characterize your relationship with the person shown at the*  
224 *beginning of this section?, and Relative to what you know about other people's*  
225 *close relationships, how would you characterize your relationship with the person*  
226 *shown at the beginning of this section? Participants responded with a number*  
227 *between one (Not close at all) and seven (Very close) (Berscheid et al., 1989).*  
228 The We-scale comprised the following question: *Please select the appropriate*  
229 *number below to indicate to what extent you would use the term “WE” to*  
230 *characterize you and the person shown at the beginning of this section.*  
231 Participants responded with a number between one (*Not at all*) and seven (*Very*  
232 *much so*). For each participant and each identity we created a composite  
233 “familiarity score” by averaging the scores in the three scales.

234 We also introduced a scale aimed at estimating the amount of interaction or  
235 contact between the participant and the target identity. The scale was based on  
236 the work by (Idson and Mischel, 2001), and participants were asked to respond  
237 Yes/No to the following six questions: *Have you ever seen him during a*  
238 *departmental event?*, *Have you ever seen him during a party?*, *Have you ever*  
239 *had a group lunch/dinner/drinks with him?*, *Have you ever had a one-on-one*  
240 *lunch/dinner/drinks with him?*, *Have you ever texted him personally (not a group*  
241 *message)?*, and *Have you ever emailed him personally (not a group email)?* The  
242 responses were converted to 0/1 and for each participant and for each identity  
243 we created a “contact score” by summing all the responses.

244 For each subject separately, to obtain a measure of familiarity and contact  
245 related to each morph, we averaged the familiarity and contact scores of each  
246 pair of identities (e.g., the familiarity score of morph *ab* was the average of the  
247 scores for identity *a* and identity *b*).

#### 248 ***Psychometric fit***

249 For both experiments we fitted a group-level psychometric curve using Logit  
250 Mixed-Effect models as implemented in *lme4* (Bates et al., 2015). For each  
251 experiment and each session, we fitted a model of the form

$$252 \quad y^k = \text{logit} \left( \beta_0 x + \sum_{i=1}^n (\beta_i + z_i^k) I_i \right)$$

253 where  $k$  indicates the subject,  $n$  is the number of angular locations ( $n = 8$  for the  
254 first experiment, and  $n = 4$  for the second experiment),  $I_i$  is an indicator variable  
255 for the angular location,  $\beta_i$  are the model fixed-effects, and  $z_i$  are the subject-  
256 level random-effects (random intercept). From this model, we defined for each  
257 subject the Point of Subjective Equality (PSE) as the point  $x$  such that  $\text{logit}(x) =$   
258  $0.5$ , that is for each angular location

$$259 \quad PSE_i^k = -\frac{\beta_i}{\beta_0} - \frac{z_i^k}{\beta_0} = PSE_i^p + \Delta PSE_i^k$$

260 Thus, the PSE for subject  $k$  at angular location  $i$  can be decomposed in a  
261 population-level PSE and a subject-specific deviation from the population level,  
262 indicated with  $PSE^p$  and  $\Delta PSE^k$  respectively.

263 In Experiment 2 we fitted three separate models for each of the morph continua.  
264 In addition, prior to fitting we removed all trials in which subjects mistakenly  
265 reported a third identity. For example, if an image belonging to morph  $ab$  was  
266 presented, and subjects responded with  $c$ , the trial was removed.

### 267 **Code and data availability**

268 Code and data for both experiments are available at [link removed: will be made  
269 public after publication].

## 270 **Results**

### 271 ***Experiment 1***

272 In this experiment, participants performed a two-alternative forced-choice (AFC)  
273 task on identity discrimination. In each trial they saw a face presented for 50 ms,  
274 and were asked to indicate which of the two identities they just saw. Each face  
275 could appear in one of eight stimulus locations. Participants performed the same  
276 experiment with the same task a second time, at least 33 days after the first  
277 session (average 35 days  $\pm$  4 days standard deviation).

278 Participants showed stable and idiosyncratic retinal heterogeneity for  
279 identification. The PSE estimates for the two sessions were significantly  
280 correlated (see Table 1 and Figure 2B), showing stable estimates, and the within-  
281 subject correlations of  $\Delta$ PSEs (see Methods) was significantly higher than the  
282 between-subject correlation (correlation difference: 0.87 [0.64, 1.10], 95% BCa  
283 confidence intervals (Efron, 1987); see Table 2), showing that the biases were  
284 idiosyncratic (see Figure 2A for example fits for two different subjects).

285

286

| Table 1.<br>Correlation of parameter estimates across sessions for the two experiments.                            |                   |          |     |           |
|--------------------------------------------------------------------------------------------------------------------|-------------------|----------|-----|-----------|
| Parameter                                                                                                          | r                 | t        | df  | p         |
| Experiment 1                                                                                                       |                   |          |     |           |
| PSE                                                                                                                | 0.89 [-0.23, 1]   | 4.86**   | 6   | 0.002831  |
| $\Delta$ PSE                                                                                                       | 0.71 [0.47, 0.84] | 5.47***  | 30  | 6.106e-06 |
| Experiment 2                                                                                                       |                   |          |     |           |
| PSE                                                                                                                | 0.98 [0.93, 0.99] | 15.22*** | 10  | 3.042e-08 |
| $\Delta$ PSE                                                                                                       | 0.64 [0.5, 0.75]  | 9.02***  | 118 | 3.997e-15 |
| Note: All confidence intervals are 95% BCa with 10,000 repetitions.<br>* $p < .05$ . ** $p < .01$ . *** $p < .001$ |                   |          |     |           |

287

| Table 2.<br>Comparison of within-subjects correlations of parameter estimates across sessions with between-subjects correlations. |                                |                      |                                |
|-----------------------------------------------------------------------------------------------------------------------------------|--------------------------------|----------------------|--------------------------------|
| Morph                                                                                                                             | Within-subjects r              | Between-subjects r   | Difference                     |
| Experiment 1                                                                                                                      |                                |                      |                                |
| ab                                                                                                                                | 0.65 <sup>†</sup> [0.57, 0.8]  | -0.22 [-0.41, -0.01] | 0.87 <sup>†</sup> [0.63, 1.1]  |
| Experiment 2                                                                                                                      |                                |                      |                                |
| ab                                                                                                                                | 0.32 [-0.10, 0.62]             | -0.02 [-0.15, 0.11]  | 0.34 [-0.07, 0.69]             |
| ac                                                                                                                                | 0.62 <sup>†</sup> [0.35, 0.79] | -0.07 [-0.21, 0.08]  | 0.68 <sup>†</sup> [0.41, 0.92] |
| bc                                                                                                                                | 0.85 <sup>†</sup> [0.61, 0.95] | -0.08 [-0.27, 0.12]  | 0.92 <sup>†</sup> [0.68, 1.15] |
| Note: All confidence intervals are 95% BCa with 10,000 repetitions.<br><sup>†</sup> indicates that the CIs do not contain 0.      |                                |                      |                                |

288

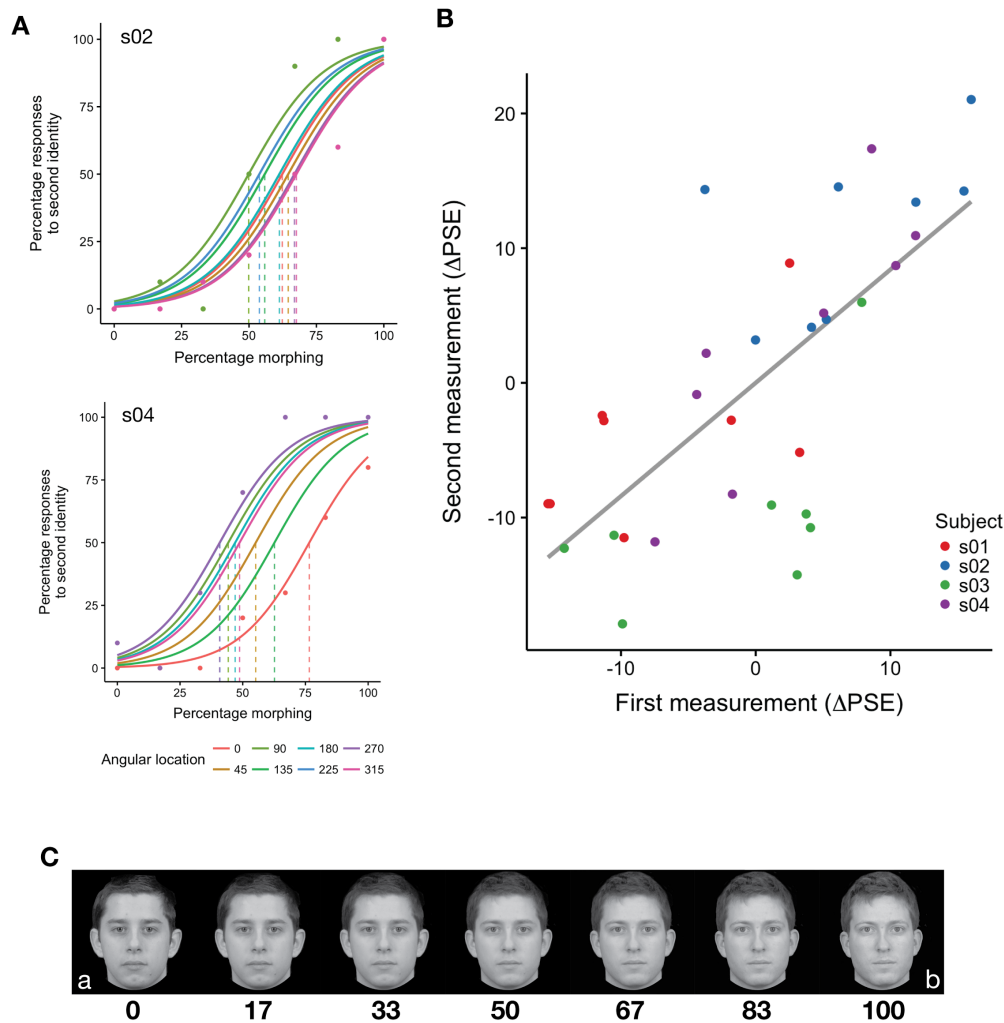

**Figure 2. Stable and idiosyncratic biases in identification in Experiment 1.**

A) Psychometric fit for two subjects from one of the two sessions. Colors indicate angular location; actual data (points) are shown only for the extreme locations to avoid visual clutter. B) The parameter estimates across sessions (at least 33 days apart) were stable ( $r = 0.71$  [0.47, 0.84], see Table 1). C) Example morphs used in the experiment. Note that the morphs depicted here are shown for illustration only, and participants saw morphs of identities that were personally familiar to them.

289

290



## 291 **Experiment 2**

292 In this experiment, participants performed a similar task as in Experiment 1, with  
293 the following differences. First, each face was presented for 100 ms instead of  
294 50 ms in order to make the task easier; second, each face could belong to one  
295 of three morphs, and participants were required to indicate which of three  
296 identities the face belonged to; third, each face could appear in four retinal  
297 locations instead of eight (see Figure 1). Each participant performed another  
298 experimental session at least 28 days after the first session (average 33 days  $\pm$   
299 8 days SD).

300 We found that participants exhibited stable biases across sessions for the three  
301 morphs (see Table 1 and Figure 3). Interestingly, within-subjects correlations  
302 were higher than between-subjects correlations for the two morphs that  
303 included the identity *c* (morphs *ac* and *bc*), but not for morph *ab* (see Table 2),  
304 suggesting stronger differences in spatial heterogeneity caused by identity *c*. To  
305 test this further, we performed a two-way ANOVA on the PSE estimates across  
306 sessions with participants and angular locations as factors. The ANOVA was run  
307 for each pair of morphs containing the same identity (e.g., for identity *a* the  
308 ANOVA was run on data from morphs *ab* and *ac*), and the PSE estimates were  
309 transformed to be with respect to the same identity (e.g., for identity *b* we  
310 considered  $PSE_{bc}$  and  $100 - PSE_{ab}$ ). We found significant interactions between  
311 participants and angular locations for identity *b* ( $F(27, 120) = 1.77, p = 0.01947$ )  
312 and identity *c* ( $F(27, 120) = 3.34, p = 3.229e-06$ ), but not identity *a* ( $F(27, 120) =$

313 1.17,  $p = 0.2807$ ), confirming that participants showed increased spatial  
314 heterogeneity for identities  $b$  and  $c$ . Moreover, inspecting the  $\Delta$ PSE estimates  
315 for each individual subjects (Figure 4A) revealed lower variance across retinal  
316 locations of the biases for morph  $ab$  than the other two morphs.

317 The variance of the average  $\Delta$ PSE estimates across sessions for each subject  
318 was significantly correlated with the reported familiarity of the identities  
319 ( $r = -0.56$  [-0.71, -0.30],  $t(28) = -3.59$ ,  $p = 0.001248$ ), showing that the strength  
320 of the retinal bias for identities was inversely modulated by personal familiarity  
321 (see Figure 4B). Because the amount of personal familiarity was correlated with  
322 the amount of contact with a target identity ( $r = 0.45$  [0.17, 0.68],  $t(28) = 2.65$ ,  
323  $p = 0.01304$ ), we tested whether a linear model predicting  $\Delta$ PSE with both  
324 contact and familiarity as predictors could fit the data better. Both models were  
325 significant, but the model with two predictors explained more variance as  
326 indicated by higher  $R^2$ :  $R^2 = 0.45$ , adjusted  $R^2 = 0.40$  for the model with both  
327 Familiarity and Contact scores ( $F(2, 27) = 10.82$ ,  $p = 0.0003539$ ), and  $R^2 = 0.32$ ,  
328 adjusted  $R^2 = 0.29$  for the model with the Familiarity score only ( $F(1, 28) = 12.88$ ,  
329  $p = 0.001248$ ). Importantly, both predictors were significant (see Table 3),  
330 indicating that familiarity modulated the variance of the  $\Delta$ PSE estimates in  
331 addition to modulation based on the amount of contact with a person. After  
332 adjusting for the contact score, the variance of the  $\Delta$ PSE estimates and the  
333 familiarity score were still significantly correlated ( $r_p = -0.42$  [-0.61, -0.16],  $t(28) =$   
334  $-2.42$ ,  $p = 0.02235$ ).

| Table 3. Models predicting variance of the $\Delta$ PSE estimates across angular locations in Experiment 2. |                      |              |                           |                              |          |          |
|-------------------------------------------------------------------------------------------------------------|----------------------|--------------|---------------------------|------------------------------|----------|----------|
| <b>Model</b>                                                                                                | <b>R<sup>2</sup></b> | <b>Score</b> | <b><math>\beta</math></b> | <b><math>\eta_p^2</math></b> | <b>t</b> | <b>p</b> |
| <b>1</b>                                                                                                    | 0.32                 | Familiarity  | -0.0574                   | 0.32                         | -3.59    | 0.0013   |
| <b>2</b>                                                                                                    | 0.45                 | Familiarity  | -0.0390                   | 0.17                         | -2.38    | 0.0249   |
|                                                                                                             |                      | Contact      | -0.0452                   | 0.19                         | -2.512   | 0.0183   |

335

336

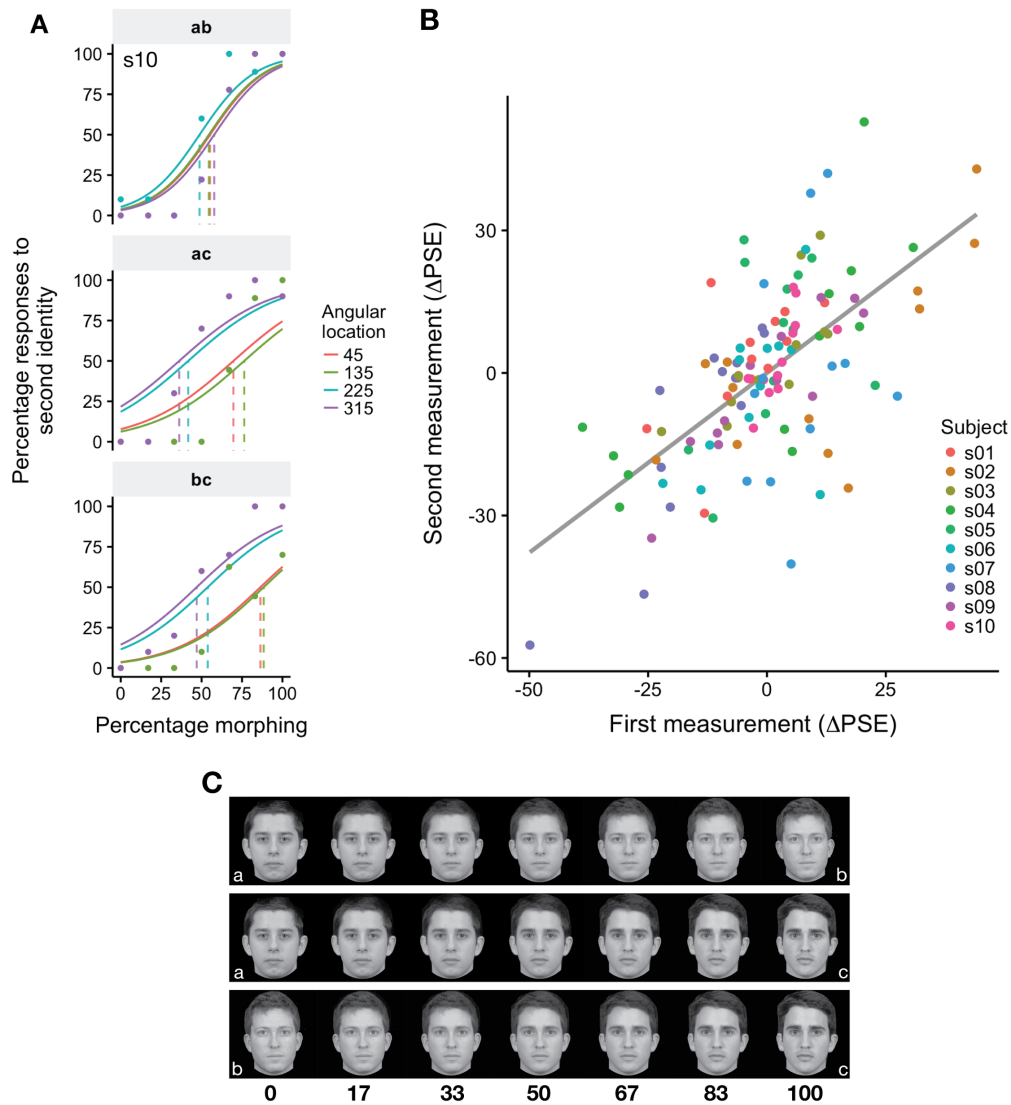

**Figure 3. Stable and idiosyncratic biases in identification in Experiment 2.**

A) Psychometric fit for one subject from one of the two sessions for each of the morphs. Colors indicate angular location; actual data (points) are shown only for the extreme locations to avoid visual clutter. B) The parameter estimates across sessions (at least 28 days apart) were stable ( $r = 0.64$  [0.5, 0.75], see Table 1). C) Example morphs used in the experiment. Note that the morphs depicted here are shown only for illustration (participants saw morphs of identities who were personally familiar).

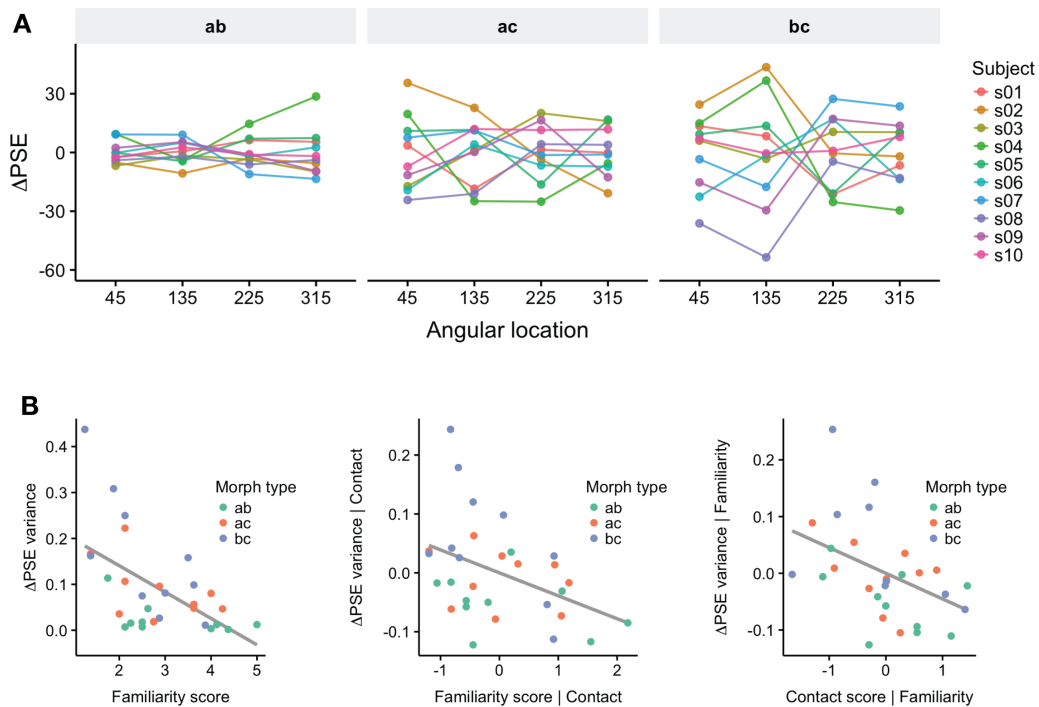

**Figure 4. The strength of idiosyncratic biases was modulated by personal familiarity.** A) Individual subjects'  $\Delta$ PSE for each morph, averaged across sessions. Note the difference in variance across angular locations for the three different morphs (left to right)). B) The variance across angular locations of  $\Delta$ PSE estimates was inversely correlated with the reported familiarity of the identities (left panel;  $r = -0.56$  [-0.71, -0.30]), even when adjusting for the Contact score (middle panel;  $r_p = -0.42$  [-0.61, -0.16]). The right panel shows the scatterplot between the Contact score and the  $\Delta$ PSE variance, adjusted for the Familiarity score, which were significantly correlated as well ( $r_p = -0.44$  [-0.62, -0.17]). See Methods for definition of the Familiarity score and the Contact score.

338

339

## 340 **Discussion**

341 Afraz et al. (2010) reported spatial heterogeneity for recognition of facial  
342 attributes such as gender and age, suggesting that relatively independent neural  
343 populations tuned to facial features might sample different regions of the visual  
344 field. Prolonged social interactions with personally familiar faces lead to  
345 facilitated, prioritized processing of those faces. Here we wanted to investigate  
346 if this learning of face identity through repeated social interactions also affects  
347 these local visual processes, by measuring spatial heterogeneity of identity  
348 recognition. We measured whether face identification performance for  
349 personally familiar faces differed according to the location in the visual field  
350 where face images were presented. We found that participants exhibited  
351 idiosyncratic, retinotopic biases for different face identities that were stable  
352 across experimental sessions. Importantly, the variability of the retinotopic bias  
353 was reduced with increased familiarity with the target identities. These data  
354 support the hypothesis that familiarity entails learning visual features that affect  
355 processing in visual areas with a retinotopic organization (Visconti di Oleggio  
356 Castello et al., 2017a).

357 These results extend the reports of spatial heterogeneity in visual processing to  
358 face identification. Similar biases exist for high-level judgments such as face  
359 gender and age (Afraz et al., 2010), as well as shape discrimination (Afraz et al.,  
360 2010), crowding, and saccadic precision (Greenwood et al., 2017). Afraz et al.  
361 (2010) suggested that neurons in IT exhibit biases that are dependent on retinal

362 location because their receptive field sizes are not large enough to provide  
363 complete translational invariance, and stimuli in different locations will activate  
364 a limited group of neurons. In this work, we show that these perceptual biases  
365 for face processing not only exist for gender and age judgments (Afraz et al.,  
366 2010), but also for face identification and that these biases are affected by  
367 learning. Retinotopic organization is stronger in earlier visual areas, suggesting  
368 that high-level judgments of gender, age, and identity may be biased by  
369 variability of feature detectors in visual areas such as the occipital face area, or  
370 even earlier.

371 In this work, we showed that the extent of variation in biases across retinal  
372 locations was inversely correlated with the reported familiarity with individuals,  
373 suggesting that a history of repeated interaction with a person may tune the  
374 responses of neurons to that individual in different retinal locations, generating  
375 more homogeneous responses. Repeated exposure to the faces of familiar  
376 individuals during real-life social interactions results in a detailed representation  
377 of the visual appearance of a personally familiar face. Our results showed that  
378 both ratings of familiarity and ratings of amount of contact were strong  
379 predictors for reduced retinotopic bias. This supports our hypothesis that  
380 facilitated processing might be mediated by the development or tuning of  
381 detectors for diagnostic fragments of personally familiar faces that may exist in  
382 the visual pathway in areas that still have localized analyses and have a

383 retinotopic organization (Gobbini et al., 2013; Visconti di Oleggio Castello et al.,  
384 2014, 2017b; Visconti di Oleggio Castello and Gobbini, 2015).

385 Future research can investigate the mechanism that generates these biases and  
386 how learning reduces them. However, our results suggest that prioritized  
387 processing for personally familiar faces may exist at relatively early stages of the  
388 visual processing hierarchy, as shown by the local biases reported here. We  
389 hypothesize that these differences may be one of the mechanisms that underlies  
390 the known behavioral advantages for perception of personally familiar faces  
391 (Burton et al., 1999; Gobbini and Haxby, 2007; Gobbini, 2010; Gobbini et al.,  
392 2013; Visconti di Oleggio Castello et al., 2014, 2017b; Ramon et al., 2015;  
393 Visconti di Oleggio Castello and Gobbini, 2015; Chauhan et al., 2017; Ramon  
394 and Gobbini, 2017).

## 395 **References**

- 396 Afraz A, Pashkam MV, Cavanagh P (2010) Spatial heterogeneity in the  
397 perception of face and form attributes. *Curr Biol* 20:2112–2116.
- 398 Aron A, Aron EN, Smollan D (1992) Inclusion of Other in the Self Scale and the  
399 structure of interpersonal closeness. *J Pers Soc Psychol* 63:596.
- 400 Bates D, Mächler M, Bolker B, Walker S (2015) Fitting Linear Mixed-Effects  
401 Models Using lme4. *J Stat Softw* 67:1–48.
- 402 Berscheid E, Snyder M, Omoto AM (1989) The Relationship Closeness  
403 Inventory: Assessing the closeness of interpersonal relationships. *J Pers*  
404 *Soc Psychol* 57:792.
- 405 Bobes MA, Lage Castellanos A, Quiñones I, García L, Valdes-Sosa M (2013)  
406 Timing and tuning for familiarity of cortical responses to faces. *PLoS One*  
407 8:e76100.



- 408 Burton AM, Wilson S, Cowan M, Bruce V (1999) Face Recognition in Poor-  
409 Quality Video: Evidence From Security Surveillance. *Psychol Sci* 10:243–  
410 248.
- 411 Chauhan V, Visconti di Oleggio Castello M, Soltani A, Gobbini MI (2017) Social  
412 Saliency of the Cue Slows Attention Shifts. *Front Psychol* 8:738.
- 413 Cialdini RB, Brown SL, Lewis BP, Luce C, Neuberg SL (1997) Reinterpreting  
414 the empathy--altruism relationship: When one into one equals oneness. *J*  
415 *Pers Soc Psychol* 73:481.
- 416 Diamond R, Carey S (1986) Why faces are and are not special: An effect of  
417 expertise. *J Exp Psychol Gen* 115:107.
- 418 Efron B (1987) Better Bootstrap Confidence Intervals. *J Am Stat Assoc* 82:171–  
419 185.
- 420 Faul F, Erdfelder E, Buchner A, Lang A-G (2009) Statistical power analyses  
421 using G\*Power 3.1: tests for correlation and regression analyses. *Behav*  
422 *Res Methods* 41:1149–1160.
- 423 Faul F, Erdfelder E, Lang A-G, Buchner A (2007) G\*Power 3: a flexible  
424 statistical power analysis program for the social, behavioral, and  
425 biomedical sciences. *Behav Res Methods* 39:175–191.
- 426 Gächter S, Starmer C, Tufano F (2015) Measuring the Closeness of  
427 Relationships: A Comprehensive Evaluation of the “Inclusion of the Other  
428 in the Self” Scale. *PLoS One* 10:e0129478.
- 429 Gobbini MI (2010) Distributed process for retrieval of person knowledge. *Social*  
430 *neuroscience: Toward understanding the underpinnings of the social*  
431 *mind*:40–53.
- 432 Gobbini MI, Gors JD, Halchenko YO, Rogers C, Guntupalli JS, Hughes H,  
433 Cipolli C (2013) Prioritized Detection of Personally Familiar Faces. *PLoS*  
434 *One* 8:e66620.
- 435 Gobbini MI, Haxby JV (2007) Neural systems for recognition of familiar faces.  
436 *Neuropsychologia* 45:32–41.
- 437 Greenwood JA, Szinte M, Sayim B, Cavanagh P (2017) Variations in crowding,  
438 saccadic precision, and spatial localization reveal the shared topology of  
439 spatial vision. *Proc Natl Acad Sci U S A* 114:E3573–E3582.
- 440 Guntupalli JS, Gobbini MI (2017) Reading Faces: From Features to  
441 Recognition. *Trends Cogn Sci* 21:915–916.

- 442 Idson LC, Mischel W (2001) The personality of familiar and significant people:  
443 the lay perceiver as a social-cognitive theorist. *J Pers Soc Psychol*  
444 80:585–596.
- 445 Kleiner M, Brainard D, Pelli D, Ingling A, Murray R (2007) What's new in  
446 Psychtoolbox-3. *Perception*.
- 447 Natu V, O'Toole AJ (2011) The neural processing of familiar and unfamiliar  
448 faces: A review and synopsis. *Br J Psychol* 102:726–747.
- 449 Ramon M, Gobbini MI (2017) Familiarity matters: A review on prioritized  
450 processing of personally familiar faces. *Vis cogn*:1–17.
- 451 Ramon M, Vizioli L, Liu-Shuang J, Rossion B (2015) Neural microgenesis of  
452 personally familiar face recognition. *Proc Natl Acad Sci U S A* 112:E4835–  
453 E4844.
- 454 Sugiura M (2014) Neuroimaging studies on recognition of personally familiar  
455 people. *Front Biosci* 19:672–686.
- 456 Taylor MJ, Arsalidou M, Bayless SJ, Morris D, Evans JW, Barbeau EJ (2009)  
457 Neural correlates of personally familiar faces: parents, partner and own  
458 faces. *Hum Brain Mapp* 30:2008–2020.
- 459 Visconti di Oleggio Castello M, Gobbini MI (2015) Familiar Face Detection in  
460 180ms. *PLoS One* 10:e0136548.
- 461 Visconti di Oleggio Castello M, Guntupalli JS, Yang H, Gobbini MI (2014)  
462 Facilitated detection of social cues conveyed by familiar faces. *Front Hum*  
463 *Neurosci* 8:678.
- 464 Visconti di Oleggio Castello M, Halchenko YO, Guntupalli JS, Gors JD, Gobbini  
465 MI (2017a) The neural representation of personally familiar and unfamiliar  
466 faces in the distributed system for face perception. *Sci Rep* 7:12237.
- 467 Visconti di Oleggio Castello M, Wheeler KG, Cipolli C, Gobbini MI (2017b)  
468 Familiarity facilitates feature-based face processing. *PLoS One*  
469 12:e0178895.
- 470 Willenbockel V, Sadr J, Fiset D, Horne GO, Gosselin F, Tanaka JW (2010)  
471 Controlling low-level image properties: The SHINE toolbox. *Behav Res*  
472 *Methods* 42:671–684.
- 473 Young AW, Burton AM (2017) Are We Face Experts? *Trends Cogn Sci*.
- 474

## 475 Legends

476 **Figure 1. Experimental paradigm.** The left panel shows the experimental  
477 paradigm, while the right panel shows the angular locations used in Experiment  
478 1 (eight locations, top panel) and in Experiment 2 (four locations, bottom panel).

479 **Figure 2. Stable and idiosyncratic biases in identification in Experiment 1.**  
480 A) Psychometric fit for two subjects from one of the two sessions. Colors  
481 indicate angular location; actual data (points) are shown only for the extreme  
482 locations to avoid visual clutter. B) The parameter estimates across sessions (at  
483 least 33 days apart) were stable ( $r = 0.71$  [0.47, 0.84], see Table 1). C) Example  
484 morphs used in the experiment. Note that the morphs depicted here are shown  
485 for illustration only, and participants saw morphs of identities that were  
486 personally familiar to them.

487 **Figure 3. Stable and idiosyncratic biases in identification in Experiment 2.**  
488 A) Psychometric fit for one subject from one of the two sessions for each of the  
489 morphs. Colors indicate angular location; actual data (points) are shown only for  
490 the extreme locations to avoid visual clutter. B) The parameter estimates across  
491 sessions (at least 28 days apart) were stable ( $r = 0.64$  [0.5, 0.75], see Table 1).  
492 C) Example morphs used in the experiment. Note that the morphs depicted here  
493 are shown only for illustration (participants saw morphs of identities who were  
494 personally familiar).

495 **Figure 4. The strength of idiosyncratic biases was modulated by personal**  
496 **familiarity.** A) Individual subjects'  $\Delta$ PSE for each morph, averaged across  
497 sessions. Note the difference in variance across angular locations for the three  
498 different morphs (left to right)). B) The variance across angular locations of  $\Delta$ PSE  
499 estimates was inversely correlated with the reported familiarity of the identities  
500 (left panel;  $r = -0.56$  [-0.71, -0.30]), even when adjusting for the Contact score  
501 (middle panel;  $r_p = -0.42$  [-0.61, -0.16]). The right panel shows the scatterplot  
502 between the Contact score and the  $\Delta$ PSE variance, adjusted for the Familiarity  
503 score, which were significantly correlated as well ( $r_p = -0.44$  [-0.62, -0.17]). See  
504 Methods for definition of the Familiarity score and the Contact score.

505 **Table 1.** Correlation of parameter estimates across sessions for the two  
506 experiments.

507 **Table 2.** Comparison of within-subjects correlations of parameter estimates  
508 across sessions with between-subjects correlations.

509 **Table 3.** Models predicting variance of the  $\Delta$ PSE estimates across angular  
510 locations in Experiment 2.

511

512 **Tables**

| Table 1.<br>Correlation of parameter estimates across sessions for the two experiments.                            |                   |          |     |
|--------------------------------------------------------------------------------------------------------------------|-------------------|----------|-----|
| Parameter                                                                                                          | r                 | t        | df  |
| Experiment 1                                                                                                       |                   |          |     |
| PSE                                                                                                                | 0.89 [-0.23, 1]   | 4.86**   | 6   |
| ΔPSE                                                                                                               | 0.71 [0.47, 0.84] | 5.47***  | 30  |
| Experiment 2                                                                                                       |                   |          |     |
| PSE                                                                                                                | 0.98 [0.93, 0.99] | 15.22*** | 10  |
| ΔPSE                                                                                                               | 0.64 [0.5, 0.75]  | 9.02***  | 118 |
| Note: All confidence intervals are 95% BCa with 10,000 repetitions.<br>* $p < .05$ . ** $p < .01$ . *** $p < .001$ |                   |          |     |

513

| Table 2.<br>Comparison of within-subjects correlations of parameter estimates across sessions with between-subjects correlations. |                                |                      |                                |
|-----------------------------------------------------------------------------------------------------------------------------------|--------------------------------|----------------------|--------------------------------|
| Morph                                                                                                                             | Within-subjects r              | Between-subjects r   | Difference                     |
| Experiment 1                                                                                                                      |                                |                      |                                |
| ab                                                                                                                                | 0.65 <sup>†</sup> [0.57, 0.8]  | -0.22 [-0.41, -0.01] | 0.87 <sup>†</sup> [0.63, 1.1]  |
| Experiment 2                                                                                                                      |                                |                      |                                |
| ab                                                                                                                                | 0.32 [-0.10, 0.62]             | -0.02 [-0.15, 0.11]  | 0.34 [-0.07, 0.69]             |
| ac                                                                                                                                | 0.62 <sup>†</sup> [0.35, 0.79] | -0.07 [-0.21, 0.08]  | 0.68 <sup>†</sup> [0.41, 0.92] |
| bc                                                                                                                                | 0.85 <sup>†</sup> [0.61, 0.95] | -0.08 [-0.27, 0.12]  | 0.92 <sup>†</sup> [0.68, 1.15] |
| Note: All confidence intervals are 95% BCa with 10,000 repetitions.<br>† indicates that the CIs do not contain 0.                 |                                |                      |                                |

514

| Table 3. Models predicting variance of the $\Delta$ PSE estimates across angular locations in Experiment 2. |                      |              |                           |                              |          |          |
|-------------------------------------------------------------------------------------------------------------|----------------------|--------------|---------------------------|------------------------------|----------|----------|
| <b>Model</b>                                                                                                | <b>R<sup>2</sup></b> | <b>Score</b> | <b><math>\beta</math></b> | <b><math>\eta_p^2</math></b> | <b>t</b> | <b>p</b> |
| <b>1</b>                                                                                                    | 0.32                 | Familiarity  | -0.0574                   | 0.32                         | -3.59    | 0.0013   |
| <b>2</b>                                                                                                    | 0.45                 | Familiarity  | -0.0390                   | 0.17                         | -2.38    | 0.0249   |
|                                                                                                             |                      | Contact      | -0.0452                   | 0.19                         | -2.512   | 0.0183   |

515
